# Supplementary material for: KSHV-encoded vIL-6 collaborates with deregulated c-Myc to drive plasmablastic neoplasms in mice
Source: PubMed Central journal article supplement (PMC4771969; doi:10.1038/bcj.2016.6), 2016-02-26
Supplement: bcj20166x3.pdf [file bcj20166x3.pdf]

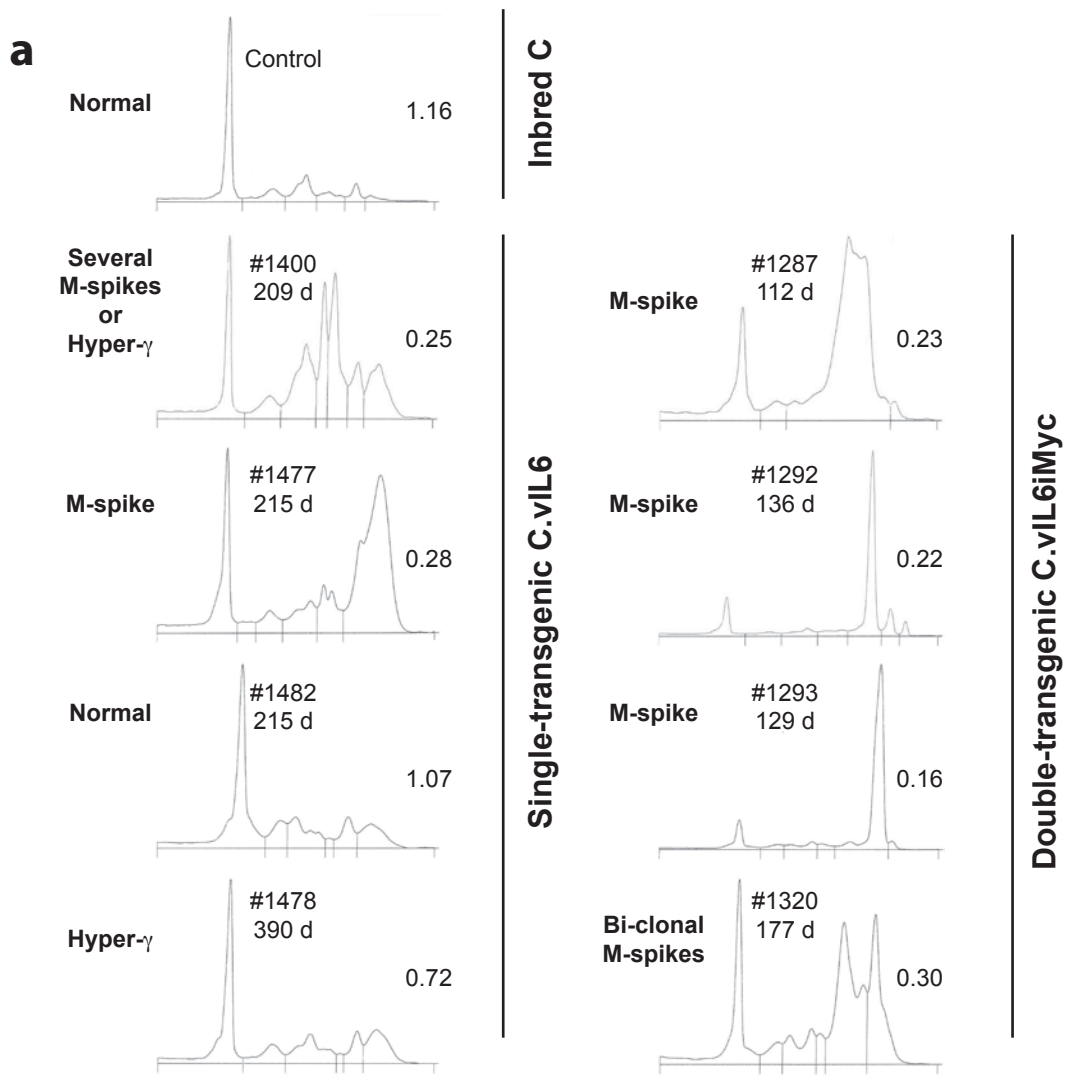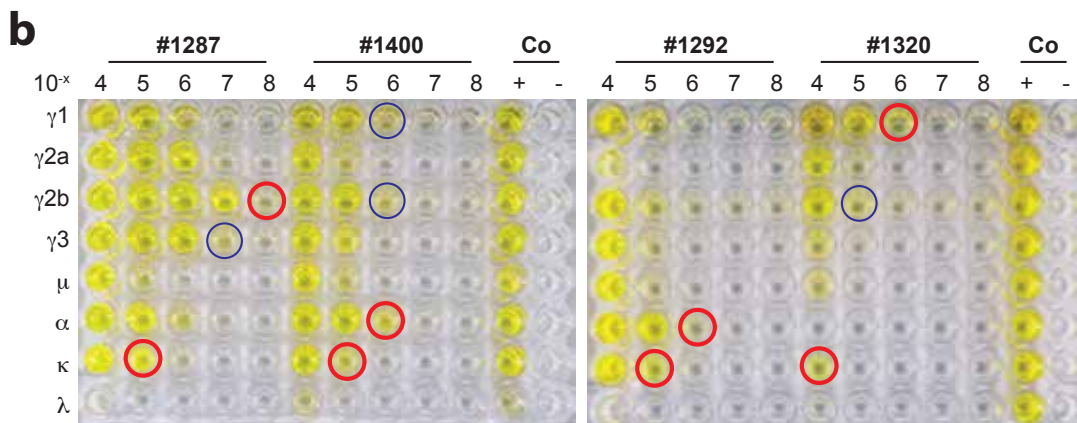

Supplemental Figure 2: Rosean *et al.*
